# Supplementary material
Source: publisher figshare collection journal article supplement (https://geolsoc.figshare.com/ndownloader/files/14298989)
Supplement: Supplementary file 1 [file 14298989]

## Sheet: Sheet1
Ch. 4, Table S1 Volcaniclastic sandstones/siltstsone XRF
Sample	NZ13-155	NZ13-157	NZ13-158	NZ13-174	NZ13-176		NZ13-222	NZ13-223	NZ13-227	NZ13-228	NZ13-229	NZ13-230	NZ13-232	NZ13-233	NZ13-234	NZ13-240	AR13--241	NZ13-244
Rock type	sandstone	sandstone	sandstone	sandstone	sandstone		siltstone	siltstone	andesite	andesite	siltstone	siltstone	sandstone	sandstone	siltstone	sandstone	sandstone	sandstone
area	Redcliff stream	Redcliff stream	Redcliff stream	Princhester stream	Princhester stream		quarry off Brook St.	quarry off Brook St.	Grampian Reserve	Grampian Reserve	Grampian Reserve	Grampian Reserve	Grampian Reserve	Grampian Reserve	Grampian Reserve	Jickell's bridge, Maitai R.	Jickell's bridge, Maitai R.	Maitai camp
stratigraphy	Brunel Fm.	Brunel Fm.	Brunel Fm.				Grampian Fm.	Grampian Fm.	Grampian Fm.	Grampian Fm.	Grampian Fm.	Grampian Fm.	Grampian Fm.	Grampian Fm.	Grampian Fm.	Grampian Fm.	Grampian Fm.	Groom Fm.
Region	Takitimu Mtns.	Takitimu Mtns.	Takitimu Mtns.	Takitimu Mtns.	Takitimu Mtns.		Nelson region	Nelson region	Nelson region	Nelson region	Nelson region	Nelson region	Nelson region	Nelson region	Nelson region	Nelson region	Nelson region	Nelson region
GPS	S45 73016 E167 74447	S45 73016 E167 74447	S45 73016 E167 74447	S45 61264 E16791516	S45 61264 E16791516		S41 29101 E173 29364	S41 29101 E173 29364	S41 29303 E173 28847	S41 29440 E173 28706	S41 29440 E173 28706	S41 29440 E173 28706	S41 29504 E173 28566	S41 29504 E173 28566	S41 29504 E173 28566	S41 27459 E173 30687	S41 27518 E173 32181	S41 28688 E173 33025
Major elements
SiO2	52.82	51.67	54.34	46.78	50.3002		46.0708	46.9043	68.4003	46.535	56.2927	48.5694	51.23	46.5262	40.7453	50.37	50.38	57.8753
Al2O3	14.37	14.4	15.07	17.47	15.6378		16.7373	15.3031	14.3514	10.1871	13.9969	15.9885	9.68	10.4177	11.9002	10.71	12.19	17.4681
Fe2O3	7.76	11.63	10.87	11.22	11.0349		9.65265	10.2087	4.29135	2.76045	5.0235	10.4346	2.48	2.67655	7.65155	2.85	10.23	8.04895
MgO	4.82	4.51	3.58	5.45	4.73355		6.7802	7.7013	1.7286	1.1088	1.7336	6.6429	0.97	1.16415	3.7014	1.01	8.51	2.7405
CaO	11.82	7.73	5.96	8.48	10.261		11.8247	11.7211	1.85925	19.7158	8.5892	9.4248	17.41	17.0842	16.7558	17.18	11.62	3.3698
Na2O	1.58	3	4.18	3.48	1.95975		2.7202	1.99995	4.55265	2.0559	2.3837	3.5343	2.5	2.4079	0.64675	2.28	2.43	2.56795
K2O	0.087	0.895	0.548	0.838	0.76179		0.390775	0.285565	1.54267	1.5373	2.76588	0.20592	1.19	1.5721	2.55218	1.731	0.268	1.41085
TiO2	0.963	1.148	1.362	1.01	1.03515		0.7105	0.7164	0.59697	0.33495	0.629415	0.90585	0.317	0.35024	0.657695	0.339	0.673	1.10533
MnO	0.098	0.19	0.194	0.13	0.185925		0.157325	0.17114	0.07035	0.042735	0.06895	0.17028	0.049	0.048755	0.20099	0.046	0.18	0.110635
P2O5	0.154	0.191	0.282	0.184	0.202005		0.10759	0.12537	0.09447	0.06699	0.164495	0.16632	0.062	0.07164	0.160195	0.075	0.129	0.159355
LOI	4.93	4.15	3.04	4.39	3.7		4.46	4.65	2.26	15.07	8.2	3.82	13.86	17.33	14.85	13.38	2.79	5.12
Total	99.402	99.514	99.426	99.432	99.8122		99.6122	99.7869	99.748	99.415	99.8483	99.8629	99.748	99.6493	99.822	99.971	99.4	99.9768
Trace elements
Zn	52.4	110.1	123.9	107.3	84.3		73.5	85.2	68.1	73.7	100	87	65.3	65.3	108.5	70.4	80.8	101.7
Cu	77.2	162.5	116.4	126.5	124.7		104.5	103.8	13.6	13.8	25.2	101.8	12.4	12.4	134	14.5	87.7	56.6
Ni	65.5	25.5	14.2	19.2	26.7		64.6	88.8	16	15.3	24.5	60.8	15.4	15.4	74	18.3	101.1	24.1
Cr	153.7	28.7	6.3	31	26		158	223.4	45.5	27.7	57.1	127.6	29.3	29.3	238.4	34.6	353.7	68.5
V	289.7	412.2	339.3	372.9	320.7		265.3	295.7	82.6	47.8	124.3	303.1	48.9	48.9	282.1	60.4	301.4	188.3
Ba	13.3	115.4	64.6	79.9	83.6		35.7	21.1	311	238.9	363.1	9.6	182.7	182.7	338.4	303.6	35.8	204.9
Sc	41	38.3	32.7	39	31		36.4	42	14.1	14.8	18.1	32	14.2	14.2	33.2	14.2	50	29.9
La	6	4.5	6.9	4.6	3.2		2.2	-0.1	23	23.7	25	2.8	18.4	18.4	11.6	22.2	1.5	10.4
Ce	15.1	15.8	21.7	16.3	15.3		6.4	5.8	54.6	52.9	61	8	42.1	42.1	22	51.1	3.4	32.7
Nd	10.9	12.2	18.8	13.3	8.6		7.1	6.5	27.2	26.6	28.6	9.3	22.8	22.8	13.6	23.9	7.3	18.4
U	0	0.3	0.2	0.4	0.3		0.1	-0.2	2.3	2.3	2.1	0	1.7	1.7	0.4	2	0.2	1.5
Th	0.6	0.2	1.5	-1.1	1.7		0.7	0.8	10	9.4	10.4	1.1	7.9	7.9	3.2	7.2	0.5	5.2
Pb	1.2	2.3	3.1	2.7	1.9		2.2	2.4	12.8	13.3	21.1	3	11.4	11.4	7.9	10.9	2	3.8
Nb	6.3	1.3	3.1	2.1	1.7		1.1	1.3	8.7	6.9	9.3	1.6	6	6	3.1	7.3	0.9	6.4
Zr	66	73.1	137.5	72.3	52.8		33	32.8	216.5	147.5	178.8	50.4	136.3	136.3	60.5	144	32.3	138.5
Y	16.6	22.8	37.3	22.2	18.7		15.1	15.8	30.8	26.3	32	18.6	22.4	22.4	19.6	27	14.9	28
Sr	131.8	377.6	248	312.3	281.7		194.6	222.1	195.9	254.9	252.4	371.2	226	226	194.2	262	268.8	192.7
Rb	0.8	12.9	9.5	10.4	18.8		4.9	3.9	40	51.3	108.9	3.4	40.7	40.7	88.3	59.3	4	41.9
